# Supplementary material
Source: publisher figshare collection journal article supplement (https://sage.figshare.com/ndownloader/files/20024624)
Supplement: Supplementary file 1 [file 20024624]

1 **Supplementary Appendix**

2 **Genetic Variation in *TCF7L2* rs7903146 Correlating with Peripheral Arterial Disease in**

3 **Longstanding Type 2 Diabetes**

4

5 **Contents**

6 ■ **Supplementary Methods.** Clinical and laboratory data, assessment of peripheral arterial  
7 disease, *TCF7L2* genotyping, and statistical analysis

8 ■ **Table S1.** Clinical and laboratory characteristics of patients with type 2 diabetes according  
9 to the transcription factor 7-like 2 (*TCF7L2*) gene variant rs7903146.

10 ■ **Table S2.** Univariate regression analysis for peripheral arterial disease and selected risk  
11 factors (n = 1818)

12 ■ **Table S3.** Association of the *TCF7L2* rs7903146 (C/T) genotypes with the risk of  
13 peripheral arterial disease according to the duration of type 2 diabetes

## 14 **Supplementary Methods**

### 15 **Clinical and laboratory data**

16 The clinical information of the subjects was recorded by their physicians. From each patient,  
17 their medical history, familial history of diabetes, age of diabetes onset, and smoking habit. ,  
18 Body weight and height was measured, and their body mass index (BMI) was calculated as  
19 body weight kilograms divided by the square of height in meters. Blood pressure was measured  
20 using a standard methods. Venous blood samples were collected after an overnight fasting  
21 period of at least 12 h. HbA1c was measured by affinity chromatography (Bio-Rad  
22 Laboratories, Hercules, CA, USA) in a National Glycated Hemoglobin Standardization  
23 Program level II-certified laboratory. Fasting plasma glucose, aspartate transaminase (AST),  
24 alanine transaminase (ALT), and lipid profile were measured using an automated chemistry  
25 analyzer (Hitachi 7600, Tokyo, Japan). Fasting insulin and C-peptide were measured by  
26 chemiluminescence enzyme immunoassays (Abbott, Lake Forest, IL, USA). The estimated  
27 glomerular filtration rate (eGFR) was calculated according to the Modification of Diet in Renal  
28 Disease equation.

### 29 **Assessment of peripheral arterial disease**

30 PAD was defined as ankle-brachial index (ABI)  $\leq 0.9$  or previous history of lower extremity  
31 bypass and/or endovascular therapy. ABI was performed in the supine position after at least 5  
32 minutes of rest, a trained technicians used a pulse wave Doppler and ABI device (VP-1000,  
33 Colin Co., Komaki, Japan) in both dorsalis pedis arteries and brachial arteries. Technicians  
34 followed a standard protocol, systolic BP (SBP) of the brachial artery was used for the upper  
35 extremities, whereas duplicate SBPs of the dorsalis pedis artery were used for the two lower

36 extremities. The ABI was calculated separately for each leg by taking the higher SBP in each  
37 lower extremity and dividing by the highest upper-extremity SBP. The lowest of these two leg-  
38 specific ABIs was used to classify the ABI score for each participant.

### 39 ***TCF7L2* genotyping**

40 Genomic DNA was isolated (Qiagen, Hilden, Germany) according to the manufacturer's  
41 instructions, and stored at  $-20^{\circ}\text{C}$ . Genotyping master mix (ThermoFisher, *TCF7L2* TaqMan®  
42 single nucleotide polymorphism [SNP] Genotyping Assays, Cat #4351379, Waltham, MA,  
43 USA) and fluorescent probes (ThermoFisher, Waltham, MA, USA) was used for variant  
44 detection. The PCR conditions were as follows: (1) initial denaturation for 15 seconds at  $94^{\circ}\text{C}$ ,  
45 (2) annealing, and (3) extension at for 60 seconds at  $60^{\circ}\text{C}$ . The fluorescent signal intensities  
46 were analyzed using the BioRad CFX96 Real-Time PCR system (BioRad, Hercules, CA, USA).

### 47 **Statistical analysis**

48 All data are expressed as the mean  $\pm$  standard deviation or frequencies with percentage. The  
49 Kolmogorov-Smirnov test for normality was performed for the appropriate statistical analyses  
50 for continuous variables. Fasting insulin, fasting C-peptide, triglyceride, high-density  
51 lipoprotein cholesterol, AST, ALT were analyzed after logarithmic transformation. To assess  
52 Hardy-Weinberg equilibrium, a likelihood ratio test was performed. The baseline  
53 characteristics were examined using chi-square test for the categorical variables and one-way  
54 analysis of variance for the continuous variables. Due to the prevalence of PAD was different  
55 according to the duration of diabetes, the analysis was divided into two groups (long duration  
56 of diabetes,  $\geq 10$  years; short duration of diabetes,  $< 10$  years). We analyzed the association

57 between *TCF7L2* rs7903146 variant and PAD using following multivariate logistic regression  
58 models: model 1 unadjusted; model 2 adjusted for age, sex, and BMI; model 3 further adjusted  
59 for familial history of diabetes, smoking, laboratory measurements including HbA1c, and lipid  
60 profiles. In this analysis, the presence of T/T and C/T *TCF7L2* rs7903146 genotypes were  
61 combined into a single category. Covariates were selected as potential confounding factors  
62 based on their significance in univariable regression analyses or based on their probable  
63 cardiovascular risk. Adjusted associations were shown as odds ratios (ORs) with 95%  
64 confidence intervals (CI). Two-sided P value of <0.05 were considered statistically significant.  
65 Statistical analyses were performed with SPSS Statistics for Windows, version 24.0 (IBM  
66 Corp., Armonk, NY, USA).

67

68 **Table S1.** Clinical and laboratory characteristics of patients with type 2 diabetes according to  
 69 the transcription factor 7-like 2 (*TCF7L2*) gene variant rs7903146.

|                                   | <i>TCF7L2</i> rs7903146 |              |              | P value |
|-----------------------------------|-------------------------|--------------|--------------|---------|
|                                   | C/C                     | C/T          | T/T          |         |
| Number                            | 1679                    | 137          | 2            |         |
| Age, years                        | 64.4 ± 11.9             | 64.8 ± 11.9  | 66.0 ± 0.0   | 0.930   |
| Male, n (%)                       | 917 (54.6)              | 75 (54.7)    | 2 (100.0)    | 0.436   |
| BMI, kg/m <sup>2</sup>            | 25.2 ± 3.3              | 24.9 ± 3.0   | 22.8 ± 0.8   | 0.308   |
| Diabetes duration, years          | 14.5 ± 8.5              | 14.7 ± 8.4   | 9.0 ± 0.0    | 0.628   |
| Family history of diabetes, n (%) | 718 (42.8)              | 62 (45.3)    | 0 (0.0)      | 0.384   |
| Current smoker, n (%)             | 396 (23.6)              | 35 (25.5)    | 1 (50.0)     | 0.598   |
| Hypertension, n (%)               | 390 (23.2)              | 33 (24.1)    | 1 (50.0)     | 0.654   |
| HbA1c (%)                         | 7.5 ± 1.5               | 7.6 ± 1.6    | 7.3 ± 0.4    | 0.640   |
| Fasting plasma glucose, mg/dL     | 141.5 ± 60.3            | 153.2 ± 57.2 | 137.5 ± 10.6 | 0.111   |
| Fasting C-peptide, ng/mL          | 2.3 ± 1.8               | 2.5 ± 2.1    | 2.7 ± 0.4    | 0.346   |
| Fasting insulin, μIU/mL           | 14.4 ± 25.9             | 14.1 ± 30.0  | 11.4 ± 1.1   | 0.979   |

|                          |              |               |              |       |
|--------------------------|--------------|---------------|--------------|-------|
| MDRD eGFR                | 82.7 ± 30.1  | 81.9 ± 31.9   | 70.6 ± 7.6   | 0.814 |
| Total cholesterol, mg/dL | 166.6 ± 36.7 | 171.6 ± 39.8  | 197.0 ± 24.0 | 0.165 |
| Triglycerides, mg/dL     | 154.8 ± 92.5 | 170.6 ± 148.7 | 115.5 ± 17.7 | 0.194 |
| HDL cholesterol, mg/dL   | 48.5 ± 14.0  | 48.0 ± 13.3   | 49.5 ± 10.6  | 0.930 |
| LDL cholesterol, mg/dL   | 97.7 ± 30.9  | 102.8 ± 34.9  | 134.0 ± 7.1  | 0.060 |
| AST, IU/L                | 25.8 ± 13.8  | 25.5 ± 16.4   | 24.5 ± 3.5   | 0.952 |
| ALT, IU/L                | 28.5 ± 20.5  | 26.7 ± 25.1   | 26.0 ± 0.0   | 0.613 |

---

70 Data are presented as mean ± standard deviation or number (%). ALT, alanine aminotransferase;  
71 AST, aspartate aminotransferase; BMI, body mass index; HbA1c, glycated hemoglobin; HDL  
72 cholesterol, high-density lipoprotein cholesterol; LDL cholesterol, low-density lipoprotein  
73 cholesterol; MDRD eGFR, estimated glomerular filtration rate using the Modification of Diet  
74 in Renal Disease Study equation.

75 **Table S2.** Univariate regression analysis for peripheral arterial disease and selected risk factors  
 76 (n = 1818)

|                                                       | OR    | 95% CI        | P value |
|-------------------------------------------------------|-------|---------------|---------|
| Age (years)                                           | 1.047 | 1.032 – 1.062 | <0.001  |
| Male (yes)                                            | 1.670 | 1.223 – 2.280 | 0.001   |
| BMI ( $\geq 25$ kg/m <sup>2</sup> )                   | 1.064 | 0.769 – 1.471 | 0.708   |
| Familial history of diabetes (yes)                    | 1.616 | 1.180 – 2.213 | 0.003   |
| Duration of diabetes ( $\geq 10$ years)               | 1.493 | 1.109 – 2.011 | 0.008   |
| Current smoker (yes)                                  | 2.138 | 1.344 – 3.401 | 0.001   |
| Hypertension (yes)                                    | 2.536 | 1.801 – 3.572 | <0.001  |
| HbA1c ( $\geq 7.0\%$ )                                | 0.788 | 0.490 – 1.267 | 0.326   |
| Fasting plasma glucose ( $\geq 126$ mg/dl)            | 0.813 | 0.587 – 1.125 | 0.212   |
| Total cholesterol ( $\geq 200$ mg/dl)                 | 1.866 | 1.166 – 2.986 | 0.009   |
| Triglyceride ( $\geq 250$ mg/dl)                      | 1.975 | 1.101 – 3.541 | 0.022   |
| HDL cholesterol<br>(male <40 mg/dl, female <50 mg/dl) | 0.986 | 0.974 – 1.001 | 0.300   |
| LDL cholesterol ( $\geq 100$ mg/dl)                   | 2.272 | 1.294 – 3.990 | 0.004   |

77 BMI, body mass index; CI, confidence interval; HbA1c, glycated hemoglobin; HDL, high  
 78 density lipoprotein; LDL, low density lipoprotein; OR, odds ratio.

79 **Table S3.** Association of the *TCF7L2* rs7903146 (C/T) genotypes with the risk of peripheral  
 80 arterial disease according to the duration of type 2 diabetes

|                                            | PAD (+) | PAD (-) | OR (95% CI)         | P value |
|--------------------------------------------|---------|---------|---------------------|---------|
| Total                                      | 195     | 1623    |                     |         |
| C/C                                        | 175     | 1504    | 1.000               |         |
| C/T + T/T                                  | 20      | 119     | 1.444 (0.877-2.379) | 0.149   |
| Duration of type 2 diabetes $\geq$ 10years | 100     | 671     |                     |         |
| C/C                                        | 86      | 625     | 1.000               |         |
| C/T + T/T                                  | 14      | 46      | 2.212 (1.167-4.192) | 0.015   |
| Duration of type 2 diabetes <10years       | 95      | 952     |                     |         |
| C/C                                        | 89      | 879     | 1.000               |         |
| C/T + T/T                                  | 6       | 73      | 0.812 (0.343-1.919) | 0.635   |

81 Data are number (%). CI, confidence interval; OR, odds ratio; PAD, peripheral arterial disease;

82 *TCF7L2*, transcription factor 7-like 2 gene.
